# PSYCHIATRIC SERVICES

A Journal of the  
American Psychiatric  
Association

- ◆ Health Self-Management in Serious Mental Illness: A Review of Interventions
- ◆ Measuring Fidelity to Housing First Principles: Two Outcomes Studies
- ◆ Focus on VA Services: Three New Investigations of Treatment Need and Use
- ◆ Four Exemplary Programs Chosen as 2014 Winners of APA Achievement Awards

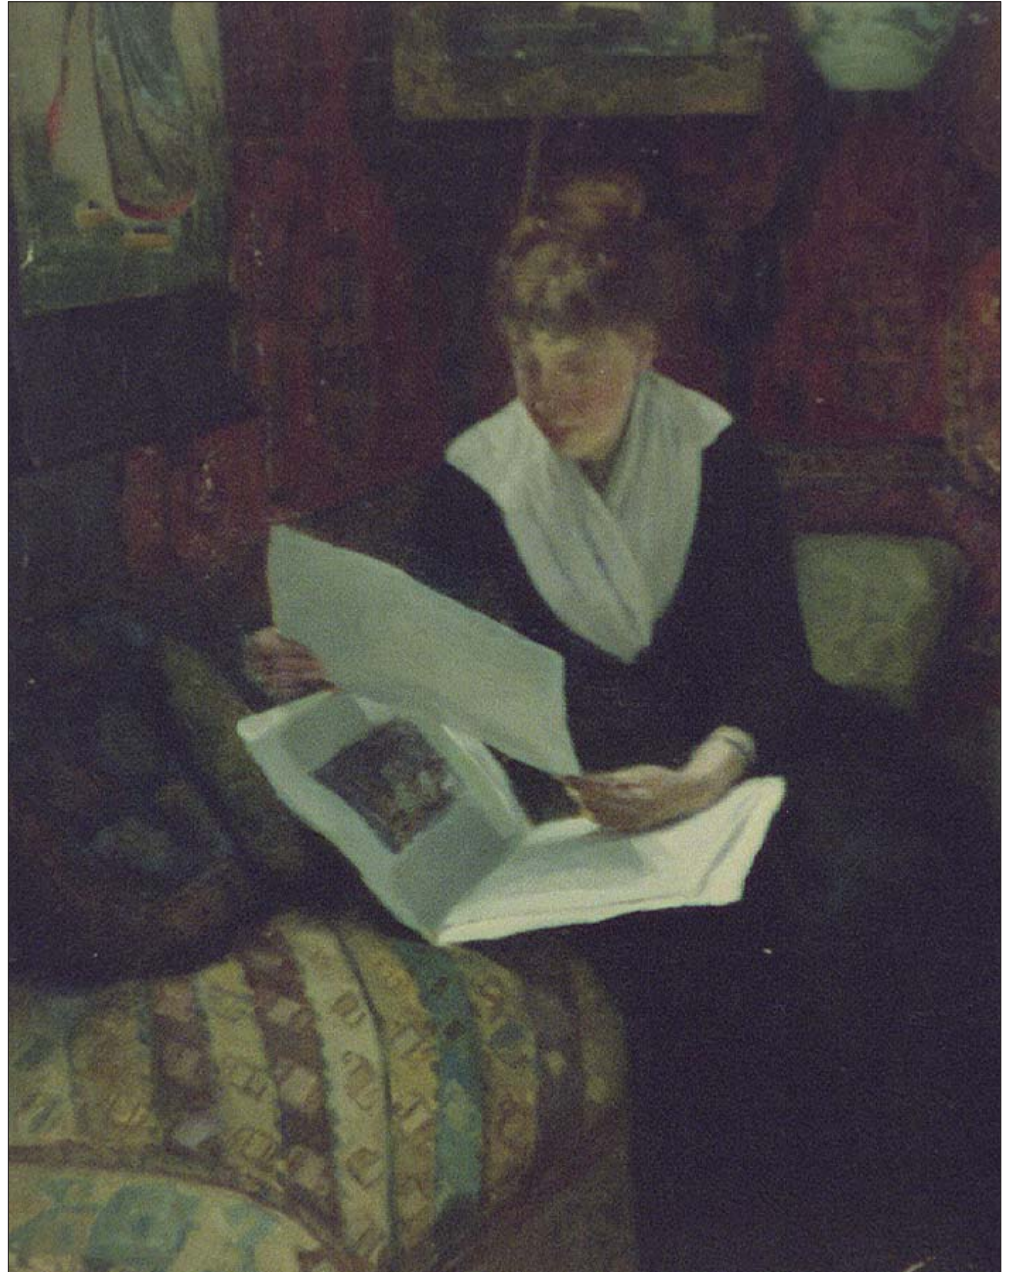

Source: http://ps.psychiatryonline.org/doi/suppl/10.1176/ps.2014.65.issue-11/suppl_file/cover.pdf
